# Supplementary material for: In situ synthesis and surface functionalization of gold nanoparticles with curcumin and their antioxidant properties: an experimental and density functional theory investigation
Source: Royal Society of Chemistry journal article supplement (doi:10.1039/c2nr33776b), 2012-12-18

## **Supporting Information**

### ***In Situ* Synthesis and Surface Functionalization of Gold Nanoparticles with Curcumin and their Antioxidant Property: An Experimental and Density Functional Theory Investigation**

Dheeraj K. Singh<sup>†</sup>, Ramya Jagannathan<sup>†</sup>, Puneet Khandelwal, Priya Abraham, Pankaj Poddar\*

*Physical & Materials Chemistry Division, National Chemical Laboratory, Pune 411 008, India*

#### **S1: HPLC data**

The data were collected on the HPLC system- Delta 600 series from Waters Corporation and 425 nm wavelength was used for detection. For this purpose the elution was carried out with gradient solvent systems with a flow rate of 1.0 mL/min at ambient temperature. The mobile phase consisted of methanol (A), water (B), and acetonitrile (C). The sample was determined using the above solvents programmed linearly from 45 to 65% acetonitrile in B for 0-15 min. The gradient then went from 65 to 45% acetonitrile in B for 15-20 min, with a constant of 5% A. The compounds were analyzed using HP ChemStation software.

The spectrum shows the absorption peaks of the curcumin used in the study.

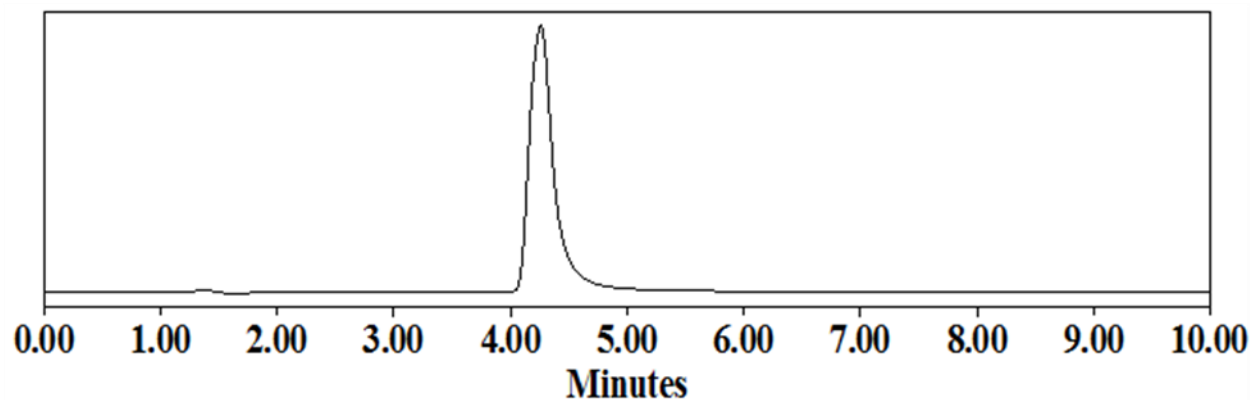

### S2: NMR Spectrum of curcumin

NMR spectroscopy was performed on the heat treated curcumin dissolved in deuterated methanol. The  $^1\text{H}$  NMR spectra was taken using a 400 MHz Bruker AVANCE instrument using a broad band probe with a z-gradient coil. Chemical shifts ( $\delta$ ) are quoted in ppm and are referenced to solvent  $\text{CD}_3\text{OD}$ . Curcumin was dissolved in  $\text{CD}_3\text{OD}$ .

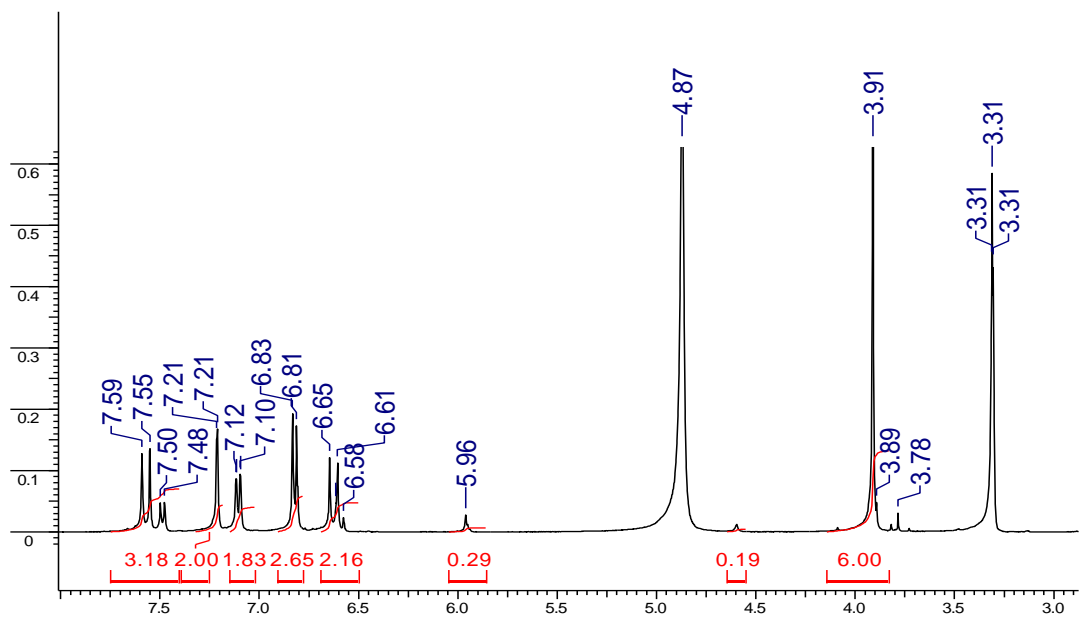

**S3: UV- visible spectroscopy of curcumin in methanol.**

The spectrum was obtained using a Cary 50 UV/vis spectrophotometer at a resolution of 1 nm.

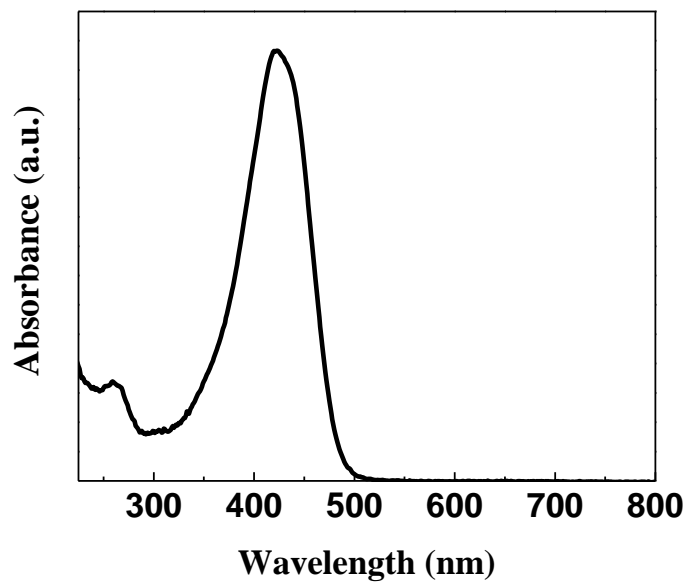

Supplement: c2nr33776b.pdf [file c2nr33776b.pdf]
